# Supplementary material for: Zn(II) Complex of Plant Phenolic Chlorogenic Acid: Antioxidant, Antimicrobial and Structural Studies
Source: PubMed Central journal article supplement (PMC7504324; doi:10.3390/ma13173745), 2020-08-24
Supplement: materials-13-03745-s001.pdf [file materials-13-03745-s001.pdf]

**Table S1.** The geometrical parameters for 5-CQA and Zn 5-CQA complexes calculated at B3LYP/6-31G(d) level; atom numbering in Figure 6.

| Parameter              | 5-CQA   | Zn 5-CQA (Structure I) * | Zn 5-CQA (Structure II) ** |
|------------------------|---------|--------------------------|----------------------------|
| Bond lengths           | -       | -                        | -                          |
| C1-C2                  | 1.552   | 1.553/1.551              | 1.548/1.546                |
| C2-C3                  | 1.542   | 1.541/1.542              | 1.541/1.541                |
| C3-C4                  | 1.542   | 1.542/1.542              | 1.542/1.542                |
| C4-C5                  | 1.529   | 1.529/1.529              | 1.528/1.528                |
| C5-C6                  | 1.532   | 1.531/1.533              | 1.531/1.531                |
| C1-C6                  | 1.544   | 1.541/1.544              | 1.546/1.540                |
| C1-C7                  | 1.528   | 1.536/1.527              | 1.526/1.546                |
| C5-O4'                 | 1.450   | 1.452/1.448              | 1.452/1.449                |
| C9'-O4'                | 1.367   | 1.366/1.370              | 1.365/1.366                |
| C9'-O3'                | 1.216   | 1.217/1.217              | 1.217/1.218                |
| C8'-C9'                | 1.472   | 1.473/1.468              | 1.473/1.470                |
| C7'-C8'                | 1.348   | 1.348/1.351              | 1.348/1.349                |
| C1'-C7'                | 1.458   | 1.458/1.352              | 1.458/1.457                |
| C1'-C2'                | 1.410   | 1.410/1.414              | 1.410/1.411                |
| C2'-C3'                | 1.389   | 1.389/1.377              | 1.389/1.389                |
| C3'-C4'                | 1.410   | 1.410/1.418              | 1.410/1.411                |
| C4'-C5'                | 1.397   | 1.397/1.410              | 1.397/1.397                |
| C5'-C6'                | 1.391   | 1.391/1.388              | 1.391/1.391                |
| C1'-C6'                | 1.404   | 1.404/1.410              | 1.404/1.404                |
| C3'-O1'                | 1.364   | 1.364/1.396              | 1.365/1.364                |
| C4'-O2'                | 1.361   | 1.361/1.319              | 1.361/1.360                |
| C1-O1                  | 1.430   | 1.433/1.430              | 1.432/1.445                |
| C3-O2                  | 1.415   | 1.416/1.415              | 1.416/1.418                |
| C4-O3                  | 1.413   | 1.413/1.413              | 1.413/1.413                |
| O2'-Zn <sup>2+</sup>   | -       | -/1.923                  | -                          |
| O4/O5-Zn <sup>2+</sup> | -       | 1.996/-<br>3.138/-       | 2.216/3.205<br>2.075/1.987 |
| O4/O5-C7               | 1.215   | 1.263/1.215              | 1.279/1.284                |
| H1-O4                  | 1.344   | 1.278/1.344              | 1.262/1.248                |
| H1-O4                  | 2.011   | 1.970/2.012              | 1.962/2.881                |
| O1'-Zn <sup>2+</sup>   | -       | -/2.161                  | -                          |
| Angles                 | -       | -                        | -                          |
| O4-C7-O5               | 123.385 | 125.110/123.324          | 120.840/125.701            |
| O1'-C3'-C4'            | 116.979 | 116.975/112.79           | 116.997/116.946            |
| C3'-C4'-O2'            | 117.209 | 117.201/120.186          | 117.216/117.174            |
| O1'-C3'-C4'-O2'        | -0.053  | 0.012/0.419              | -0.010/-0.009              |

\* structure I–metal cation is coordinated via the COO<sup>-</sup> group and –OH group from the catechol moiety; in the case of structure I the first column present the data for ligand linked to metal ion via the COO<sup>-</sup> group, and the second one show the data for ligand bonded to metal ion by the catechol part. \*\* structure II–metal cation is coordinated by two COO<sup>-</sup> groups from the quinic moiety

**Table S2.** The NBO atomic charges calculated for 5-CQA and Zn(II) 5-CQA complexes in B3LYP/6-31(d) level; atom numbering in Figure 6.

| Atom | 5-CQA  | Zn(II) 5-CQA (Structure I) * | Zn(II) 5-CQA (Structure II) ** |
|------|--------|------------------------------|--------------------------------|
| C1   | 0.186  | 0.1948/0.186                 | 0.197/0.197                    |
| C2   | -0.509 | -0.509/-0.509                | -0.506/-0.507                  |
| C3   | 0.082  | 0.082/0.082                  | 0.082/0.081                    |

|     |        |               |               |
|-----|--------|---------------|---------------|
| C4  | 0.060  | 0.060/0.060   | 0.060/0.061   |
| C5  | 0.051  | 0.051/0.051   | 0.050/0.051   |
| C6  | -0.503 | -0.501/-0.502 | -0.499/-0.505 |
| C7  | 0.835  | 0.855/0.835   | 0.803/0.846   |
| C1' | -0.102 | -0.102/-0.120 | -0.102/-0.103 |
| C2' | -0.268 | -0.269/-0.259 | -0.269/-0.268 |
| C3' | 0.285  | 0.285/0.232   | 0.285/0.285   |
| C4' | 0.301  | 0.301/0.339   | 0.301/0.302   |
| C5' | -0.301 | -0.301/-0.287 | -0.301/-0.301 |
| C6' | -0.205 | -0.205/-0.195 | -0.205/-0.204 |
| C7' | -0.136 | -0.138/-0.135 | -0.138/-0.134 |
| C8' | -0.344 | -0.342/-0.358 | -0.342/-0.344 |
| C9' | 0.790  | 0.790/0.787   | 0.790/0.792   |
| O1  | -0.781 | -0.782/-0.780 | -0.790/-0.775 |
| O2  | -0.763 | -0.764/-0.763 | -0.765/-0.761 |
| O3  | -0.742 | -0.742/-0.743 | -0.743/-0.742 |
| O4  | -0.609 | -0.759/-0.610 | -0.725/-0.700 |
| O5  | -0.697 | -0.770/-0.697 | -0.755/-0.799 |
| O1' | -0.674 | -0.675/-0.737 | -0.675/-0.674 |
| O2' | -0.666 | -0.667/-0.813 | -0.667/-0.665 |
| O3' | -0.608 | -0.609/-0.614 | -0.610/-0.613 |
| O4' | -0.574 | -0.574/-0.577 | -0.573/-0.570 |

\* structure I-metal cation is coordinated via the COO<sup>-</sup> group and -OH group from the catechol moiety; in the case of structure I the first column present the data for ligand linked to metal ion via the COO<sup>-</sup> group, and the second one show the data for ligand bonded to metal ion by the catechol part \*\* structure II-metal cation is coordinated by two COO<sup>-</sup> groups from the quinic moiety.

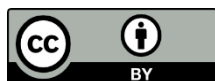

© 2020 by the authors. Submitted for possible open access publication under the terms and conditions of the Creative Commons Attribution (CC BY) license (<http://creativecommons.org/licenses/by/4.0/>).
